# Supplementary material for: Self-other distinction modulates the social softness illusion
Source: Psychol Res. 2021 Jun 25;86(4):1165–73. doi: 10.1007/s00426-021-01549-8 (PMC9090685; doi:10.1007/s00426-021-01549-8)
Supplement: Supplementary file 1 — Supplementary file1 (XLSX 12 kb) [file 426_2021_1549_MOESM1_ESM.xlsx]

## Sheet: Sheet1
	Forearm								Palm
	Egocentric perspective				Allocentric perspective				Egocentric perspective				Allocentric perspective
	No vision		Vision		No vision		Vision		No vision		Vision		No vision		Vision
Participant N	Softness	Ownership	Softness	Ownership	Softness	Ownership	Softness	Ownership	Softness	Ownership	Softness	Ownership	Softness	Ownership	Softness	Ownership
1	5.7	-1.725	-2.26	-7.075	-3.42	-1.375	0.875	-8.02	-1.675	-3.225	5.825	-4.475	-4.32	-6.59	-3.075	-3.475
2	-9.075	-3.85	-7.1	-5.9	-8.925	-4.325	-8.575	-8.625	-5.15	-3.5	-2.2	-7.875	-5.675	-4.075	-5.25	-8.2
3	0.05	-5.45	3.375	-4.625	-2.425	-3.475	2.075	-9.25	-3.15	-7.36	-2.2	-9.075	1.75	-5.85	-3.9	-9.05
4	6.125	-9.55	0.3	-6.875	2.225	-9.225	-0.15	-4.85	5.8	-9.45	5.125	-9.4	2.7	-9.475	2.55	-4.725
5	5.825	-9.725	5.325	-9.925	-3.42	-10	4.175	-9.85	5.2	-9.775	6.5	-9.85	-4.32	-9.925	-3.68	-9.925
6	-0.55	-9.975	-3.8	-9.875	-5.15	-9.85	-4.875	-9.975	-3.55	-9.925	-4.55	-9.9	-8.2	-9.925	-3.825	-9.95
7	3.1	-9.15	0.95	-9.4	-3.55	-7.2	3.1	-9.2	2.775	-9.15	0.05	-9.425	2.2	-7.55	2.275	-9.075
8	-4.35	-8.7	-2.425	-8.975	-1.775	-6.975	-2.625	-9.35	-2.7	-8.8	-8.325	-9.375	-6.375	-8.175	-4.9	-9.275
9	-1.75	-8.95	-2.85	-7.075	-1.05	-7.85	-1.9	-9.375	-2.4	-9.25	1.825	-7.85	-1.05	-9.15	-0.95	-9.725
10	4.175	-6.3	-1.625	-7.075	0.525	-5.575	-1.35	-7.425	-1.8	-6.375	-0.2	-7.575	-0.4	-5.925	-3.925	-7.8
11	0.65	-2.35	6.8	-3.9	2.025	-5.775	-0.15	-9.225	-1.95	-7.7	5.4	-6.6	-2.7	-1.85	-4.275	-7.825
12	-2.475	-5.6	-5.725	-7.2	-4.35	-6.25	-3.6	-6.95	-3.3	-6.45	-0.825	-7.55	-2.525	-6.6	-3.575	-7.25
13	-3.6	-8.875	-2.125	-8.75	-1.575	-9.95	-2.375	-9.925	-5.425	-8.775	-1.4	-9.525	-6	-9.85	-4.7	-9.825
14	-5.1	-8.825	-5.1	-8.975	-7.65	-9.525	-8.5	-8.775	-8.45	-9.05	-7.65	-9.7	-7.45	-9.7	-8.65	-9.4
15	-4.6	-3.575	-4.475	-10	-1.875	-8.825	-4	-8.4	-7.45	-8.85	-2.925	-6.075	-5.575	-6.375	-0.8	-6.5
16	2.075	-5.2	1.15	-8.3	-5.1	-2.175	-2.85	-8.075	-9.225	-7.65	-9.95	-7.575	-4.8	-7	-7.475	-10
17	-8.375	-3	-1.75	-3.175	-9.2	-8.05	-8.7	-3.65	-7.95	-3.2	-2.225	-8.14	-9.15	-8.85	-7.5	-8.125
18	-0.4	-4.85	-1.725	-5.325	-3.55	-5.75	2.7	-8	1.45	-6	-5.725	-6.8	-7.15	-5.875	2.525	-8.3
19	-6.3	-5.95	-7.5	-9.575	-1.525	-9.975	-5.9	-9.65	-6.725	-8.35	-7.4	-9.65	-7.15	-9.975	-7.5	-9.975
20	-6	-6.3	-7.15	-9.85	-5.9	-6.9	-6.4	-9.275	-6.575	-7.3	-2.7	-9.8	-6.125	-3.05	-6.375	-9.175
21	4.8	-3.075	1.15	-3.65	-1.85	-1.375	4.325	-4.65	-3.975	-5.425	-0.25	-4.475	-5.6	-1.925	-5.55	-7.6
22	-9.575	-4.775	-9.525	-7.23	-9.525	-7.05	-2.21	-8.02	-4.75	-4.825	-9.425	-8.14	-9.475	-6.1	-3.68	-8.28
23	5.775	-5.975	-7.7	-1.425	-4.325	-4.375	-6.7	-3.975	4.85	-8.5	-7.35	-7.75	-6.225	-4.625	-6.75	-6.15
24	-1.4	-8.8	-0.5	-9.375	-0.8	-8.725	0.6	-8.02	-1.575	-7.825	-2.2	-8.85	-0.15	0.2	0.65	-9.075
